# Supplementary material for: Early microbial colonization affects DNA methylation of genes related to intestinal immunity and metabolism in preterm pigs
Source: PubMed Central journal article supplement — DNA Res. 2018 Jan 19;25(3):287–96. doi: 10.1093/dnares/dsy001 (PMC6014285; doi:10.1093/dnares/dsy001), 2018-01-19

**Figure S1: Immunohistochemistry (IHC) analysis of epithelial marker between CON and AB groups.**

(A) Representative image of IHC result. (B) No significant difference of the area stained by cytokeratin between CON and AB groups was revealed according to Mann–Whitney U test. Values were presented as the mean  $\pm$  SEM.

**A**

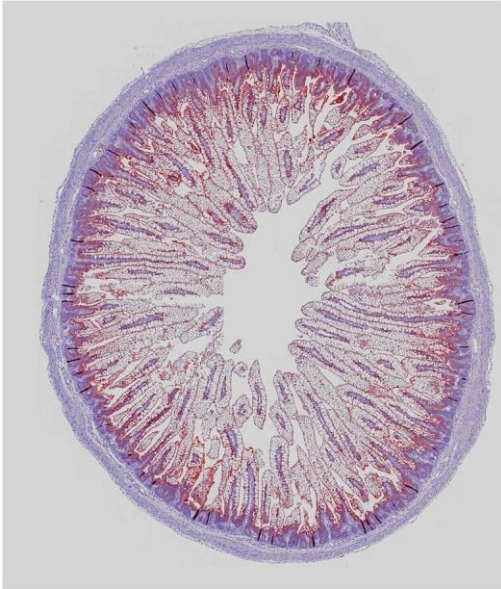

**B**

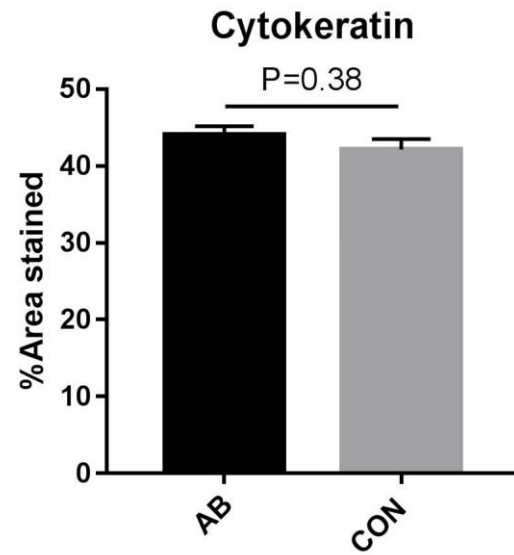

**Figure S2: Methylation level in 5 allele-specific methylation (ASM) genes between CON and AB groups.**

No significant differences of allele-specific methylation levels between CON and AB groups revealed for 5 ASM genes according to Mann–Whitney U test.

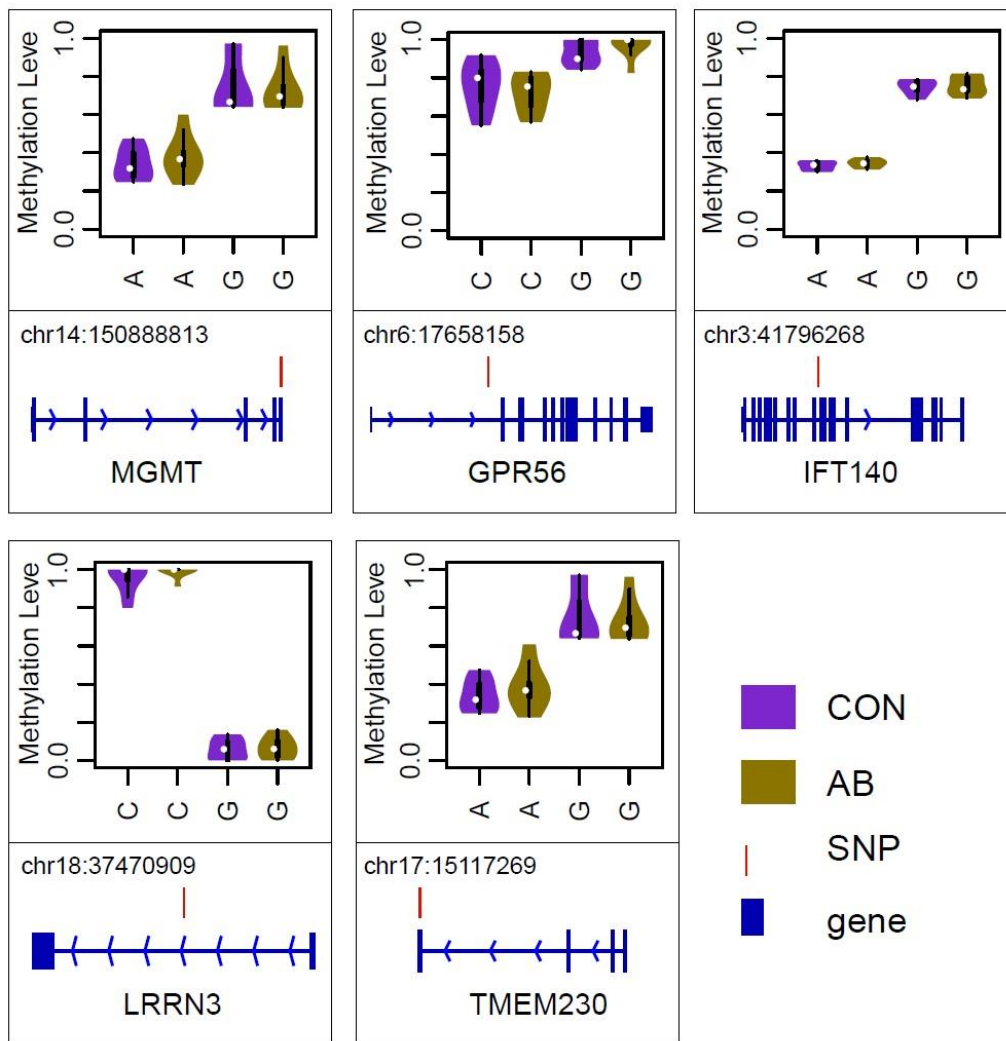

**Figure S3: Pvclust hierarchical clustering on DNA methylation of 14 samples.**

Hierarchical clustering was performed based on methylation levels of all CpG sites. In the cluster dendrogram, sample IDs were listed along X-axis (green for CON group, and red for AB group) and inter-cluster distance was indicated on Y-axis; Values at branches are approximately unbiased (AU) p-values (left), bootstrap probability (BP) values (right), and cluster labels (bottom).

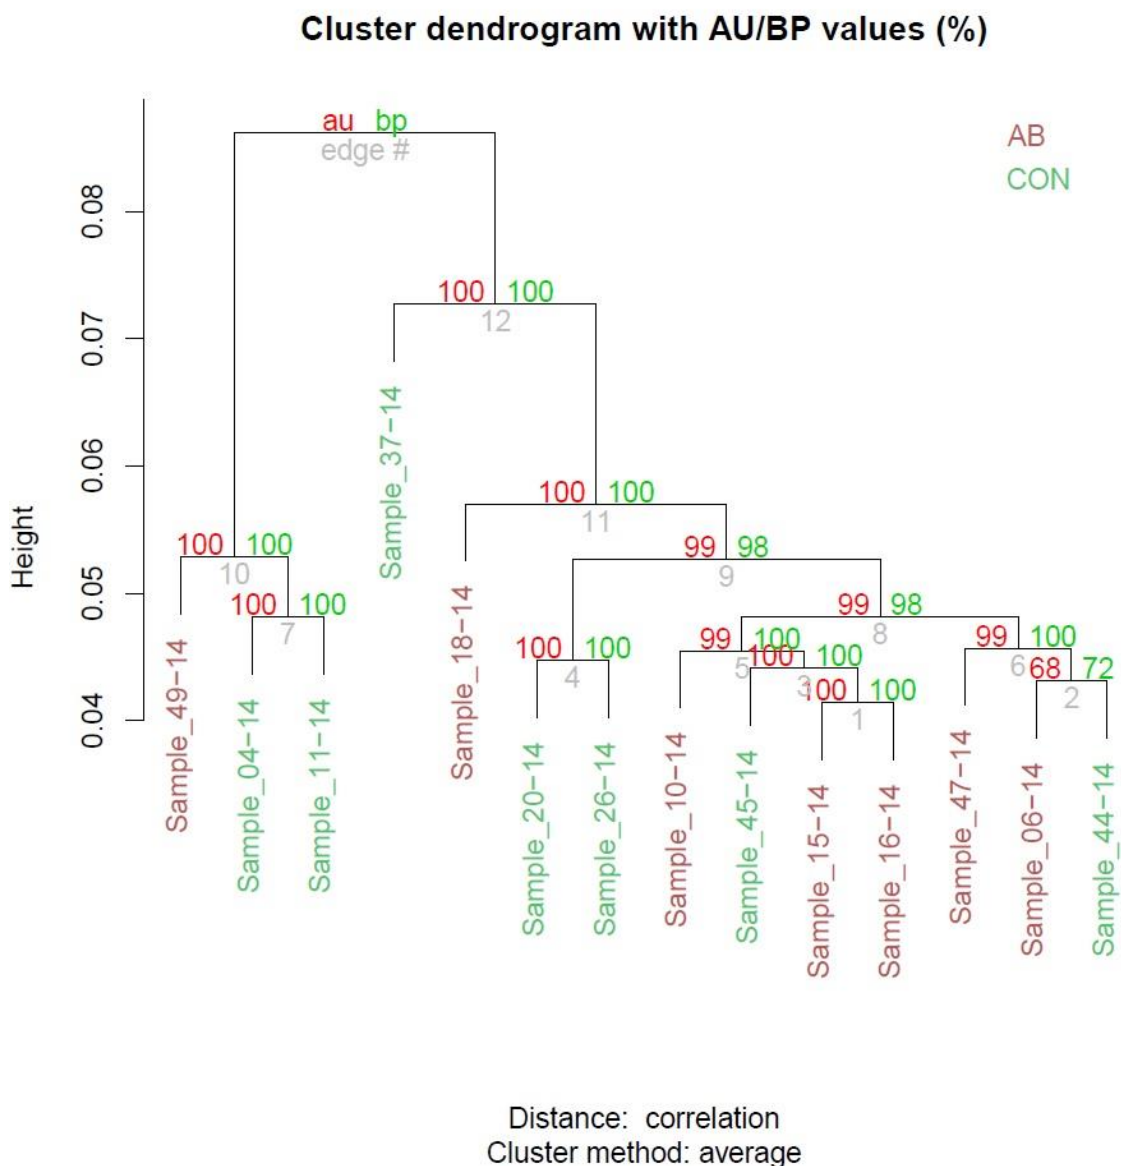

**Figure S4: Overview of methylation level in the genic regions.**

Plot of DNA methylation level in intra-group samples averaged across all genebody regions and  $\pm 5\text{kb}$  from transcriptional start sites (TSS). Smoothing was done using cubic splines.

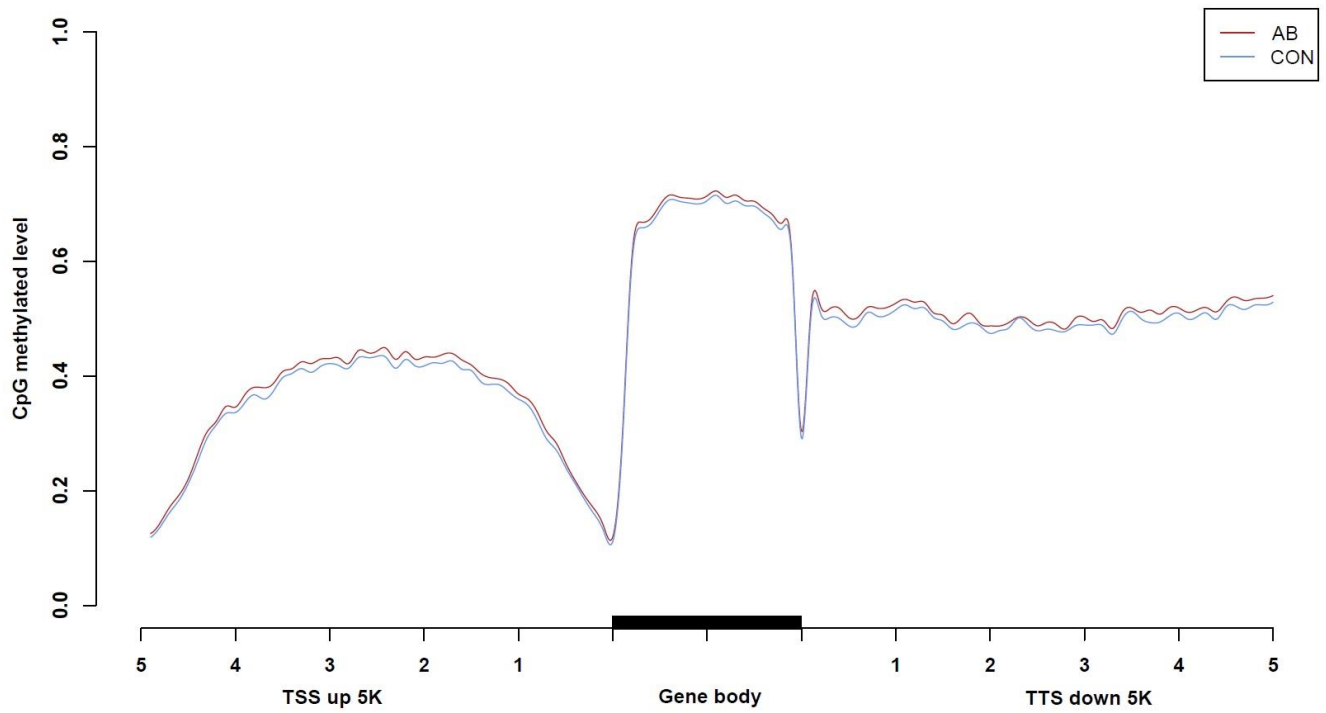

**Figure S5: Validation of DNA methylation by bisulfite sequencing PCR (BSP).**

According to the examination on DMRs in five genes, significant correlation between RRBS data and BSP data was revealed ( $P < 0.0001$ ,  $R^2 = 0.78$ ). As an example, the methylation level of the DMR in GNAS calculated from different approaches was shown.

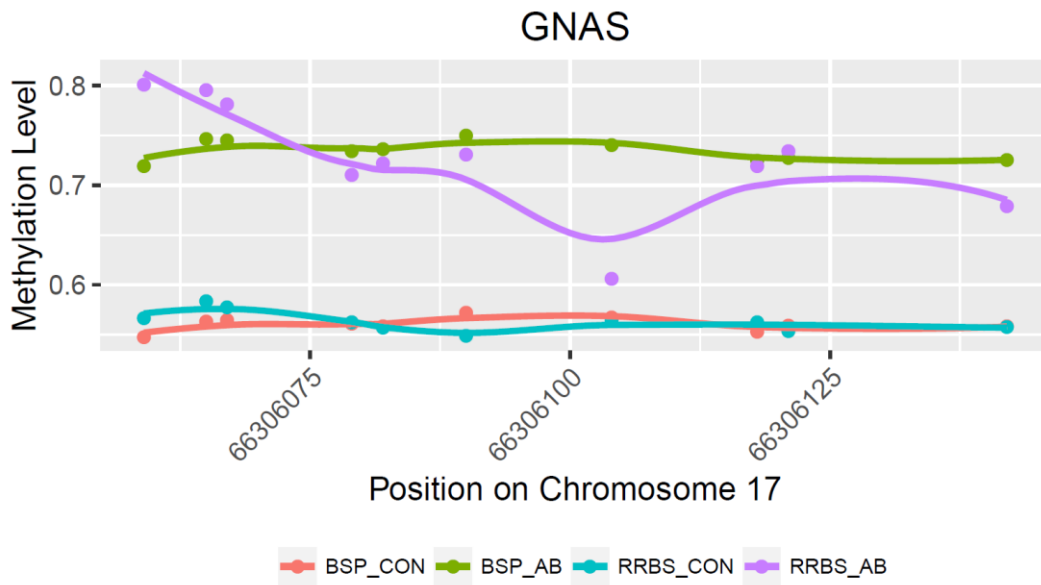

**Figure S6: Relative mRNA expression of DMR-genes.**

Relative quantification of target genes was normalized to housekeeping gene HPRT1, and was presented as the mean values  $\pm$  SEM.

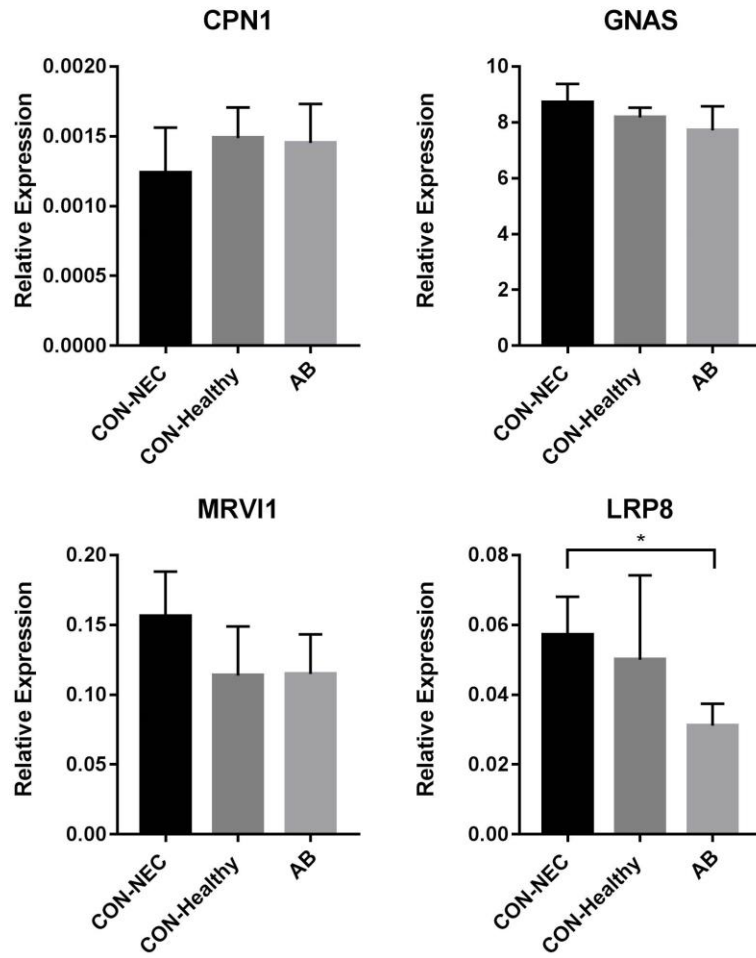

**Figure S7: Immunohistochemistry (IHC) analysis of neutrophils marker (myeloperoxidase, MPO) between CON and AB groups.**

(A) Representative image of IHC result. (B) The average number of MPO-positive cells in each pig was calculated from 10 well-oriented villi. A tendency of reduced number of MPO-positive cells in the AB versus CON group was revealed according to Mann–Whitney U test. Values were presented as the mean  $\pm$  SEM.

**A**

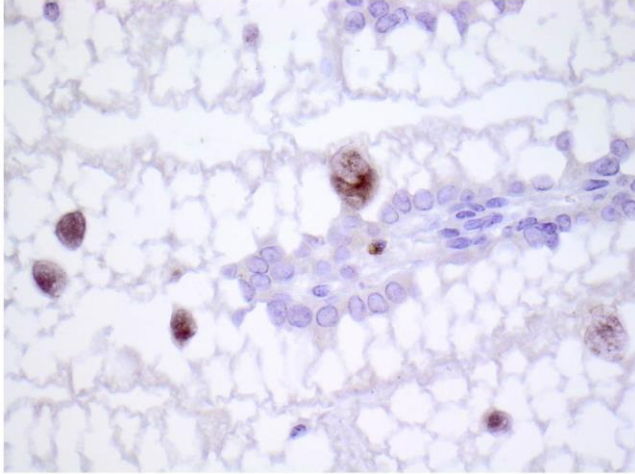

**B**

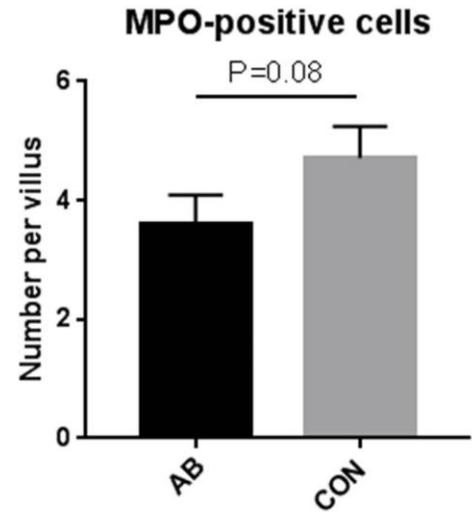

**Figure S8: Differentially expressed proteins related to glycolysis and gluconeogenesis.**

Compared with CON pigs, ALDOA (in glycolysis) was less expressed while FBP1 and PCK2 (in gluconeogenesis) were more expressed in the AB pigs. Expression quantity expressed in  $(\text{mean} \pm \text{SEM}) \times 10^5$  (n=6) defined as the sum of optical density of the each pixel of spot area, using Gel-based proteomics.

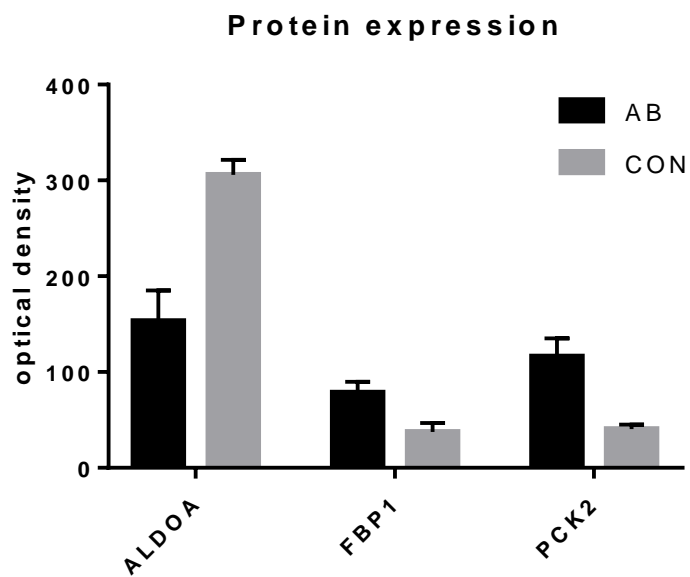

Supplement: dsy001_supplementary_figure_s1-8_-_r2.pdf [file dsy001_supplementary_figure_s1-8_-_r2.pdf]
